# Supplementary material for: What Factors Contribute to High Mechanical Strength of Tabia? Case Study of the Tabia from Coastal Forts Sites at Zhejiang, China
Source: Research Square preprint supplement (doi:10.21203/rs.3.rs-34456/v4), 2020-10-22
Supplement: Supplementary file 1 [file 0ff62e27c5f33f5ff96d7c38.docx]

**Table 2.** The compressive strength test results of the tabia samples (MPa).

| **Sample** | **TFG** | **NW** | **LW** | **JY** | **PY** | **ZY** | **HY** |
| --- | --- | --- | --- | --- | --- | --- | --- |
| **1** | 4.85 | 7.22 | 5.67 | 7.82 | 3.75 | 6.86 | 5.76 |
| **2** | 5.87 | 6.75 | 5.86 | 8.64 | 4.12 | 5.19 | 6.78 |
| **3** | 6.47 | 6.67 | 6.11 | 7.21 | 4.55 | 5.32 | 7.59 |
| **Average** | 5.73 | 6.88 | 5.88 | 7.89 | 4.14 | 5.79 | 6.71 |
