# Supplementary material for: What Factors Contribute to High Mechanical Strength of Tabia? Case Study of the Tabia from Coastal Forts Sites at Zhejiang, China
Source: Research Square preprint supplement (doi:10.21203/rs.3.rs-34456/v4), 2020-10-22
Supplement: Supplementary file 2 [file a3a013090c3c6ad1ce2409dd.docx]

**Table 6.** Sand, clay minerals, and calcite weight content (%) of tabia samples.

| Sample | Calcite | Sand | Clay minerals |
| --- | --- | --- | --- |
| TFG | 19.2 | 58.5 | 22.3 |
| NW | 39.3 | 25.2 | 35.5 |
| LW | 18.7 | 51.4 | 29.9 |
| JY | 23.6 | 40.0 | 36.4 |
| PY | 23.4 | 23.1 | 53.5 |
| ZY | 19.6 | 32.5 | 47.9 |
| HY | 31.7 | 29.1 | 39.2 |
