# Supplementary material for: What Factors Contribute to High Mechanical Strength of Tabia? Case Study of the Tabia from Coastal Forts Sites at Zhejiang, China
Source: Research Square preprint supplement (doi:10.21203/rs.3.rs-34456/v4), 2020-10-22
Supplement: Supplementary file 3 [file b921a6dabd97dc94cfa00a8e.docx]

**Table 9.** The organic additives test results of the tabia samples.

| **Sample** | **pH** | **oil** | **protein** | **blood** | **sugar** | **bubbles** | **absorbance** | **starch** |
| --- | --- | --- | --- | --- | --- | --- | --- | --- |
| **TFG** | 7 | - | - | - | - | ++ | 0.083 | - |
| **NW** | 9 | - | - | - | - | +++ | 0.086 | - |
| **LW** | 7 | - | - | - | - | ++ | 0.073 | - |
| **JY** | 7 | - | - | - | - | ++ | 0.128 | + |
| **PY** | 7 | - | - | - | - | ++ | 0.198 | + |
| **ZY** | 7 | - | - | - | - | ++ | 0.172 | + |
| **HY** | 8 | - | - | - | - | +++ | 0.063 | - |

(-: negative reaction; +: weak positive reaction; ++: median positive reaction; +++: strong positive reaction.)
